# Supplementary material for: Iodine Concentration in the Breast Milk and Urine as Biomarkers of Iodine Nutritional Status of Lactating Women and Breastfed Infants in Taiwan
Source: MDPI journal article supplement (doi:10.3390/nu15194125), 2023-09-25
Supplement: s1 [file s1]

**Supplementary Table S1.** The proportion of women with UIC  $\geq$  or  $<$  100  $\mu\text{g/L}$ 

|                                     | UIC, n (%)                   |                                 | <i>p</i> |
|-------------------------------------|------------------------------|---------------------------------|----------|
|                                     | $< 100 \mu\text{g/L}$ (n=37) | $\geq 100 \mu\text{g/L}$ (n=34) |          |
| <b>Age, years</b>                   | 34.3 $\pm$ 3.9               | 33.8 $\pm$ 4.4                  | 0.70     |
| <b>Educational status</b>           |                              |                                 | 0.64     |
| University or below (n = 58)        | 31 (53.4)                    | 27 (46.6)                       |          |
| Master or above (n = 13)            | 6 (46.2)                     | 7 (53.8)                        |          |
| <b>Infant birth body weight, g</b>  | 3062.5 $\pm$ 563.3           | 3052.8 $\pm$ 309.4              | 0.65     |
| <b>Parity</b>                       |                              |                                 | 0.44     |
| First (n = 41)                      | 23 (56.1)                    | 18 (43.9)                       |          |
| Second or above (n = 30)            | 14 (46.7)                    | 16 (53.3)                       |          |
| <b>Miscarriage history</b>          |                              |                                 | 0.14     |
| Yes (n = 27)                        | 11 (40.7)                    | 16 (59.3)                       |          |
| No (n = 44)                         | 26 (59.1)                    | 18 (40.9)                       |          |
| <b>Post-partum nourishment diet</b> |                              |                                 | 0.18     |
| Yes (n = 13)                        | 9 (69.2)                     | 4 (30.8)                        |          |
| No (n = 58)                         | 28 (48.3)                    | 30 (51.7)                       |          |
| <b>Exclusive breastfeeding</b>      |                              |                                 | 0.94     |
| Yes (n = 17)                        | 9 (52.9)                     | 8 (47.1)                        |          |
| No (n = 54)                         | 28 (51.9)                    | 26 (48.1)                       |          |
| <b>Salt intake</b>                  |                              |                                 | 0.32     |
| Iodized (n = 39)                    | 19 (48.7)                    | 20 (51.3)                       |          |
| Non-iodized (n = 14)                | 6 (42.9)                     | 8 (57.1)                        |          |
| Unknown (n = 18)                    | 12 (66.7)                    | 6 (33.3)                        |          |
| <b>Seaweed intake</b>               |                              |                                 | 0.02     |
| Yes (n = 42)                        | 17 (40.5)                    | 25 (59.5)                       |          |
| No (n = 29)                         | 20 (69.0)                    | 9 (31.0)                        |          |
| <b>Fish intake</b>                  |                              |                                 | 0.44     |
| Yes (n = 59)                        | 32 (54.2)                    | 27 (45.8)                       |          |
| No (n = 12)                         | 5 (41.7)                     | 7 (58.3)                        |          |
| <b>Seafood intake</b>               |                              |                                 | 0.68     |
| Yes (n = 42)                        | 21 (50.0)                    | 21 (50.0)                       |          |
| No (n = 29)                         | 16 (55.2)                    | 13 (44.8)                       |          |
| <b>Dairy intake</b>                 |                              |                                 | 0.18     |
| Yes (n = 63)                        | 31 (49.2)                    | 32 (50.8)                       |          |
| No (n = 8)                          | 6 (75.0)                     | 2 (25.0)                        |          |
| <b>Multivitamin intake</b>          |                              |                                 | 0.42     |
| Yes (n = 34)                        | 16 (47.1)                    | 18 (52.9)                       |          |
| No (n = 37)                         | 21 (56.8)                    | 16 (43.2)                       |          |

Age and infant birth body weight was presented by mean and standard deviation whereas other variables were presented by number and percentage.
